# Supplementary material
Source: PubMed Central journal article supplement (PMC1088493)
Supplement: TB010983s01.pdf [file TB010983s01.pdf]

This is an electronic appendix to the paper by Taylor, Latham & Woolhouse, 2001 (Risk factors for human disease emergence). *Phil. Trans. R. Soc. Lond. B* 356, 983–989.

Electronic appendices are refereed with the text. However, no attempt has been made to impose a uniform editorial style on the electronic appendices.

**Appendix A** List of 1415 species of pathogens causing human disease, divided into bacteria (and rickettsia), fungi, helminths, protozoa and viruses (and prions). Zoonotic species are shown in bold, and emerging species are underlined.

## **Bacteria (and Rickettsia)**

- Abiotrophia defectiva*  
*Achromobacter piechaudii*  
*Achromobacter xylosoxidans*  
*Acidaminococcus fermentans*  
*Acinetobacter baumannii*  
*Acinetobacter calcoaceticus*  
*Acinetobacter haemolyticus*  
*Acinetobacter johnsonii*  
*Acinetobacter junii*  
*Acinetobacter lwoffii*  
*Acinetobacter radioresistens*  
***Actinobacillus equuli***  
***Actinobacillus hominis***  
***Actinobacillus lignieresii***  
***Actinobacillus pleuropneumoniae***  
***Actinobacillus suis***  
***Actinobacillus ureae***  
*Actinomyces georgiae*  
***Actinomyces gerencseriae***  
***Actinomyces israelii***  
*Actinomyces meyeri*  
***Actinomyces naeslundii***  
*Actinomyces neuii*  
***Actinomyces odontolyticus***  
*Actinomyces radingae*  
*Actinomyces turicensis*  
*Aerococcus viridans*  
***Aeromonas caviae***  
***Aeromonas hydrophila***  
***Aeromonas sobria***  
*Aeromonas veronii*  
*Alcaligenes odorans*  
*Amycolatopsis orientalis*  
*Arcanobacterium bernardiae*  
***Arcanobacterium haemolyticum***  
***Arcanobacterium pyogenes***  
***Arcobacter butzleri***  
***Arcobacter cryaerophilus***  
***Bacillus anthracis***  
***Bacillus cereus***  
*Bacillus circulans*  
***Bacillus coagulans***  
***Bacillus licheniformis***  
*Bacillus mycoides*  
*Bacillus pumilus*  
*Bacillus sphaericus*  
***Bacillus subtilis***  
*Bacillus thuringiensis*  
*Bacteroides caccae*  
*Bacteroides distasonis*  
*Bacteroides eggerthii*  
*Bacteroides forsythus*  
***Bacteroides fragilis***  
*Bacteroides galacturonicus*  
*Bacteroides merdae*  
*Bacteroides ovatus*  
*Bacteroides pectinophilus*  
*Bacteroides splanchnicus*  
*Bacteroides stercoris*  
*Bacteroides thetaiotaomicron*  
*Bacteroides uniformis*  
*Bacteroides ureolyticus*  
*Bacteroides vulgatus*  
*Bartonella bacilliformis*  
***Bartonella elizabethae***  
***Bartonella henselae***  
*Bartonella quintana*  
***Bergeyella zoohelcum***  
*Bifidobacterium dentium*  
*Bilophila wadsworthia*  
*Bordetella avium*  
***Bordetella bronchiseptica***  
***Bordetella parapertussis***  
*Bordetella pertussis*  
***Borrelia brasiliensis***  
***Borrelia burgdorferi***  
***Borrelia caucasica***  
***Borrelia crocidurae***  
*Borrelia duttonii*  
***Borrelia hermsii***  
***Borrelia hispanica***  
***Borrelia latyschewii***  
***Borrelia mazzottii***  
***Borrelia parkeri***  
***Borrelia persica***  
*Borrelia recurrentis*  
***Borrelia turicatae***  
***Borrelia venezuelensis***  
*Brevibacillus brevis*  
*Brevundimonas diminuta*  
*Brevundimonas vesicularis*  
***Brucella melitensis***  
*Burkholderia cepacia*  
***Burkholderia mallei***  
***Burkholderia pseudomallei***  
***Campylobacter coli***  
*Campylobacter concisus*  
*Campylobacter curvus*  
***Campylobacter fetus***  
*Campylobacter gracilis*  
***Campylobacter hyointestinalis***  
***Campylobacter jejuni***  
***Campylobacter lari***  
*Campylobacter rectus*  
*Campylobacter sputorum*  
***Campylobacter upsaliensis***  
***Capnocytophaga canimorsus***  
***Capnocytophaga cynodegmi***  
*Capnocytophaga gingivalis*  
*Capnocytophaga ochracea*  
*Capnocytophaga sputigena*  
*Cardiobacterium hominis*  
*Cedecea davisae*  
*Cedecea lapagei*  
*Cedecea neteri*  
*Cellulomonas cellulans*  
*Cellulomonas turbata*  
*Centipeda periodontii*  
***Chlamydia trachomatis***  
***Chlamydophila pneumoniae***  
***Chlamydophila psittaci***  
***Chromobacterium violaceum***  
*Chryseobacterium balustinum*  
*Chryseobacterium meningosepticum*  
***Citrobacter amalonoticus***  
***Citrobacter braakii***  
***Citrobacter farmeri***  
***Citrobacter freundii***  
***Citrobacter koseri***  
***Citrobacter rodentium***  
***Citrobacter sedlakii***  
***Citrobacter werkmanii***  
***Citrobacter youngae***  
*Clostridium baratii*  
*Clostridium bifermentans*  
***Clostridium botulinum***  
*Clostridium butyricum*  
***Clostridium chauvoei***  
***Clostridium difficile***  
***Clostridium fallax***  
***Clostridium histolyticum***  
***Clostridium novyi***  
***Clostridium perfringens***  
***Clostridium ramosum***  
***Clostridium septicum***  
***Clostridium sordellii***  
***Clostridium sporogenes***  
***Clostridium tertium***  
***Clostridium tetani***  
***Collinsella aerofaciens***  
*Comamonas testosteroni*

July 29 2001

|                                                  |                                                 |                                                 |
|--------------------------------------------------|-------------------------------------------------|-------------------------------------------------|
| <i>Corynebacterium afermentans</i>               | <i>Fluoribacter bozemanai</i>                   | <i>Leptotrichia buccalis</i>                    |
| <i>Corynebacterium argentoratense</i>            | <i>Fluoribacter dumoffii</i>                    | <i>Listeria ivanovii</i>                        |
| <b><i>Corynebacterium bovis</i></b>              | <i>Fluoribacter gormanii</i>                    | <b><u><i>Listeria monocytogenes</i></u></b>     |
| <u><i>Corynebacterium diphtheriae</i></u>        | <b><u><i>Francisella tularensis</i></u></b>     | <i>Listeria seeligeri</i>                       |
| <i>Corynebacterium jeikeium</i>                  | <i>Fusobacterium mortiferum</i>                 | <i>Listeria welshimeri</i>                      |
| <b><i>Corynebacterium kutscheri</i></b>          | <b><i>Fusobacterium necrophorum</i></b>         | <b><i>Mannheimia haemolytica</i></b>            |
| <i>Corynebacterium macginleyi</i>                | <b><i>Fusobacterium nucleatum</i></b>           | <i>Megamonas hypermegale</i>                    |
| <i>Corynebacterium minutissimum</i>              | <i>Fusobacterium periodonticum</i>              | <i>Megasphaera</i> sp.                          |
| <i>Corynebacterium propinquum</i>                | <i>Fusobacterium ulcerans</i>                   | <i>Micromonas micros</i>                        |
| <i>Corynebacterium pseudodiphthericum</i>        | <b><i>Fusobacterium varium</i></b>              | <i>Moraxella catarrhalis</i>                    |
| <b><i>Corynebacterium pseudotuberculosis</i></b> | <i>Gardnerella vaginalis</i>                    | <b><i>Moraxella caviae</i></b>                  |
| <i>Corynebacterium striatum</i>                  | <i>Gemella morbillorum</i>                      | <i>Moraxella cuniculi</i>                       |
| <b><i>Corynebacterium ulcerans</i></b>           | <i>Gordonia amarae</i>                          | <b><i>Moraxella ovis</i></b>                    |
| <i>Corynebacterium urealyticum</i>               | <i>Gordonia bronchialis</i>                     | <i>Moraxella atlantae</i>                       |
| <i>Corynebacterium xerosis</i>                   | <i>Gordonia rubropertincta</i>                  | <b><i>Moraxella bovis</i></b>                   |
| <b><i>Coxiella burnetii</i></b>                  | <i>Gordonia sputi</i>                           | <b><i>Moraxella lacunata</i></b>                |
| <i>Delftia acidovorans</i>                       | <i>Gordonia terrae</i>                          | <i>Moraxella liquefaciens</i>                   |
| <b><i>Dermatophilus congolensis</i></b>          | <i>Granulicatella adjacens</i>                  | <i>Moraxella nonliquefaciens</i>                |
| <b><i>Dichelobacter nodosus</i></b>              | <b><i>Haemophilus actinomycetemcomitans</i></b> | <i>Moraxella osloensis</i>                      |
| <b><i>Edwardsiella hoshinae</i></b>              | <i>Haemophilus aphrophilus</i>                  | <i>Moraxella lincolnii</i>                      |
| <b><i>Edwardsiella tarda</i></b>                 | <u><i>Haemophilus ducreyi</i></u>               | <b><i>Morganella morgani</i></b>                |
| <b><i>Eggerthella lenta</i></b>                  | <i>Haemophilus haemolyticus</i>                 | <b><i>Mycobacterium abscessus</i></b>           |
| <b><u><i>Ehrlichia chaffeensis</i></u></b>       | <u><i>Haemophilus influenzae</i></u>            | <b><i>Mycobacterium africanum</i></b>           |
| <b><u><i>Ehrlichia equi</i></u></b>              | <i>Haemophilus parahaemolyticus</i>             | <b><i>Mycobacterium asiaticum</i></b>           |
| <b><u><i>Ehrlichia ewingii</i></u></b>           | <i>Haemophilus parainfluenzae</i>               | <b><u><i>Mycobacterium avium</i></u></b>        |
| <b><i>Ehrlichia phagocytophila</i></b>           | <i>Haemophilus paraphrophilus</i>               | <b><u><i>Mycobacterium bovis</i></u></b>        |
| <b><i>Ehrlichia sennetsu</i></b>                 | <i>Haemophilus segnis</i>                       | <i>Mycobacterium celatum</i>                    |
| <b><i>Eikenella corrodens</i></b>                | <b><i>Hafnia alvei</i></b>                      | <b><i>Mycobacterium chelonae</i></b>            |
| <b><i>Enterobacter aerogenes</i></b>             | <i>Helicobacter cinaedi</i>                     | <i>Mycobacterium conspicuum</i>                 |
| <b><i>Enterobacter amnigenus</i></b>             | <i>Helicobacter fennelliae</i>                  | <b><u><i>Mycobacterium fortuitum</i></u></b>    |
| <b><i>Enterobacter asburiae</i></b>              | <b><i>Helicobacter heilmannii</i></b>           | <b><i>Mycobacterium genavense</i></b>           |
| <b><i>Enterobacter cancerogenus</i></b>          | <b><i>Helicobacter pullorum</i></b>             | <i>Mycobacterium gordonae</i>                   |
| <b><i>Enterobacter cloacae</i></b>               | <b><i>Helicobacter pylori</i></b>               | <b><u><i>Mycobacterium haemophilum</i></u></b>  |
| <i>Enterobacter gergoviae</i>                    | <i>Kingella denitrificans</i>                   | <b><i>Mycobacterium kansasii</i></b>            |
| <b><i>Enterobacter hormaechei</i></b>            | <i>Kingella kingae</i>                          | <b><u><i>Mycobacterium leprae</i></u></b>       |
| <b><i>Enterobacter sakazakii</i></b>             | <i>Klebsiella granulomatis</i>                  | <b><i>Mycobacterium malmoense</i></b>           |
| <b><i>Enterococcus avium</i></b>                 | <i>Klebsiella ornithinolytica</i>               | <b><u><i>Mycobacterium marinum</i></u></b>      |
| <i>Enterococcus casseliflavus</i>                | <b><i>Klebsiella oxytoca</i></b>                | <b><i>Mycobacterium mucogenicum</i></b>         |
| <b><i>Enterococcus durans</i></b>                | <b><u><i>Klebsiella pneumoniae</i></u></b>      | <i>Mycobacterium peregrinum</i>                 |
| <b><u><i>Enterococcus faecalis</i></u></b>       | <b><i>Kluyvera ascorbata</i></b>                | <i>Mycobacterium porcinum</i>                   |
| <b><u><i>Enterococcus faecium</i></u></b>        | <b><i>Kluyvera cryocrescens</i></b>             | <b><i>Mycobacterium scrofulaceum</i></b>        |
| <i>Enterococcus flavescens</i>                   | <b><i>Lactobacillus</i> sp.</b>                 | <i>Mycobacterium senegalense</i>                |
| <i>Enterococcus gallinarum</i>                   | <i>Legionella anisa</i>                         | <i>Mycobacterium shimoidei</i>                  |
| <b><i>Enterococcus hirae</i></b>                 | <i>Legionella birminghamensis</i>               | <b><i>Mycobacterium simiae</i></b>              |
| <i>Enterococcus mundtii</i>                      | <i>Legionella cherrii</i>                       | <b><i>Mycobacterium smegmatis</i></b>           |
| <i>Enterococcus raffinosus</i>                   | <i>Legionella cincinnatiensis</i>               | <b><i>Mycobacterium szulgai</i></b>             |
| <b><i>Erysipelothrix rhusiopathiae</i></b>       | <i>Legionella feeleii</i>                       | <b><u><i>Mycobacterium tuberculosis</i></u></b> |
| <b><u><i>Escherichia coli</i></u></b>            | <i>Legionella hackeliae</i>                     | <b><u><i>Mycobacterium ulcerans</i></u></b>     |
| <b><i>Eubacterium brachy</i></b>                 | <i>Legionella jordanis</i>                      | <b><i>Mycobacterium xenopi</i></b>              |
| <b><i>Eubacterium combesii</i></b>               | <i>Legionella lansingensis</i>                  | <b><i>Mycoplasma fermentans</i></b>             |
| <b><i>Eubacterium contortum</i></b>              | <i>Legionella longbeachae</i>                   | <i>Mycoplasma genitalium</i>                    |
| <b><i>Eubacterium cylindroides</i></b>           | <i>Legionella oakridgensis</i>                  | <i>Mycoplasma hominis</i>                       |
| <b><i>Eubacterium limosum</i></b>                | <u><i>Legionella pneumophila</i></u>            | <i>Mycoplasma pneumoniae</i>                    |
| <b><i>Eubacterium moniliforme</i></b>            | <i>Legionella rubrilucens</i>                   | <i>Mycoplasma salivarium</i>                    |
| <b><i>Eubacterium multiforme</i></b>             | <i>Legionella sainthelensi</i>                  | <i>Myroides odoratus</i>                        |
| <b><i>Eubacterium nodatum</i></b>                | <i>Legionella tucsonensis</i>                   | <i>Neisseria cinerea</i>                        |
| <b><i>Eubacterium rectale</i></b>                | <i>Legionella wadsworthii</i>                   | <i>Neisseria elongata</i>                       |
| <b><i>Eubacterium saburreum</i></b>              | <i>Leifsonia aquatica</i>                       | <i>Neisseria flava</i>                          |
| <b><i>Eubacterium saphenum</i></b>               | <b><i>Leptospira borgpetersenii</i></b>         | <i>Neisseria flavescens</i>                     |
| <i>Eubacterium sulci</i>                         | <b><i>Leptospira inadai</i></b>                 | <u><i>Neisseria gonorrhoeae</i></u>             |
| <b><i>Eubacterium tenue</i></b>                  | <b><u><i>Leptospira interrogans</i></u></b>     | <i>Neisseria lactamica</i>                      |
| <b><i>Eubacterium timidum</i></b>                | <b><i>Leptospira kirschneri</i></b>             | <u><i>Neisseria meningitidis</i></u>            |
| <i>Ewingella americana</i>                       | <b><i>Leptospira meyeri</i></b>                 | <b><i>Neisseria mucosa</i></b>                  |
| <i>Fibrobacter intestinalis</i>                  | <b><i>Leptospira noguchii</i></b>               | <i>Neisseria perflava</i>                       |
| <i>Filifactor alovis</i>                         | <b><i>Leptospira santarosai</i></b>             | <i>Neisseria sicca</i>                          |
| <i>Finegoldia magna</i>                          | <b><i>Leptospira weilii</i></b>                 | <i>Neisseria subflava</i>                       |

|                                            |                                          |                                        |
|--------------------------------------------|------------------------------------------|----------------------------------------|
| <i>Neisseria weaveri</i>                   | <i>Providencia rettgeri</i>              | <i>Streptobacillus moniliformis</i>    |
| <i>Nocardia asteroides</i>                 | <i>Providencia stuartii</i>              | <i>Streptococcus acidominimus</i>      |
| <i>Nocardia brasiliensis</i>               | <u><i>Pseudomonas aeruginosa</i></u>     | <i>Streptococcus agalactiae</i>        |
| <i>Nocardia caviae</i>                     | <i>Pseudomonas alcaligenes</i>           | <i>Streptococcus anginosus</i>         |
| <i>Nocardia farcinica</i>                  | <i>Pseudomonas fluorescens</i>           | <i>Streptococcus bovis</i>             |
| <i>Nocardia nova</i>                       | <i>Pseudomonas pseudoalcaligenes</i>     | <i>Streptococcus canis</i>             |
| <i>Nocardia otitidiscaviarum</i>           | <i>Pseudomonas putida</i>                | <i>Streptococcus constellatus</i>      |
| <i>Nocardia pseudobrasiliensis</i>         | <i>Pseudomonas stutzeri</i>              | <i>Streptococcus criceti</i>           |
| <i>Nocardia transvalensis</i>              | <i>Pseudonocardia autotrophica</i>       | <i>Streptococcus equi</i>              |
| <i>Ochrobactrum anthropi</i>               | <i>Pseudoramibacter alactolyticus</i>    | <i>Streptococcus gordonii</i>          |
| <i>Oligella ureolytica</i>                 | <i>Psychrobacter phenylpyruvicus</i>     | <i>Streptococcus intermedius</i>       |
| <i>Oligella urethralis</i>                 | <i>Rahnella aquatilis</i>                | <i>Streptococcus milleri</i>           |
| <i>Orientia tsutsugamushi</i>              | <i>Ralstonia pickettii</i>               | <i>Streptococcus mitis</i>             |
| <i>Paenibacillus alvei</i>                 | <i>Rhodococcus equi</i>                  | <i>Streptococcus mutans</i>            |
| <i>Paenibacillus macerans</i>              | <i>Rhodococcus erythropolis</i>          | <u><i>Streptococcus pneumoniae</i></u> |
| <i>Pantoea agglomerans</i>                 | <i>Rhodococcus fascians</i>              | <u><i>Streptococcus pyogenes</i></u>   |
| <i>Pasteurella aerogenes</i>               | <i>Rhodococcus rhodnii</i>               | <i>Streptococcus salivarius</i>        |
| <i>Pasteurella caballi</i>                 | <i>Rhodococcus rhodochrous</i>           | <i>Streptococcus sanguis</i>           |
| <i>Pasteurella canis</i>                   | <i>Rickettsia africana</i>               | <i>Streptococcus sobrinus</i>          |
| <i>Pasteurella dagmatis</i>                | <i>Rickettsia akari</i>                  | <i>Streptococcus suis</i>              |
| <i>Pasteurella multocida</i>               | <i>Rickettsia akari</i>                  | <i>Streptococcus uberis</i>            |
| <i>Pasteurella pneumotropica</i>           | <i>Rickettsia australis</i>              | <i>Sutterella wadsworthensis</i>       |
| <i>Pasteurella stomatis</i>                | <i>Rickettsia conorii</i>                | <i>Suttonella indologenes</i>          |
| <i>Peptococcus niger</i>                   | <i>Rickettsia felis</i>                  | <i>Tatlockia maceachernii</i>          |
| <i>Peptostreptococcus anaerobius</i>       | <i>Rickettsia honei</i>                  | <i>Tatlockia micdadei</i>              |
| <i>Peptostreptococcus asaccharolyticus</i> | <i>Rickettsia japonica</i>               | <i>Tatumella ptyseos</i>               |
| <i>Peptostreptococcus lactolyticus</i>     | <i>Rickettsia massiliae</i>              | <i>Treponema carateum</i>              |
| <i>Peptostreptococcus prevotii</i>         | <u><i>Rickettsia prowazekii</i></u>      | <u><i>Treponema pallidum</i></u>       |
| <i>Peptostreptococcus vaginalis</i>        | <i>Rickettsia rickettsii</i>             | <i>Tropheryma whippelii</i>            |
| <i>Photobacterium damsela</i>              | <i>Rickettsia sibirica</i>               | <i>Tsukamurella inehonensis</i>        |
| <i>Plesiomonas shigelloides</i>            | <i>Rickettsia typhi</i>                  | <i>Tsukamurella paurometabola</i>      |
| <i>Porphyromonas asaccharolytica</i>       | <i>Rothia dentocariosa</i>               | <i>Tsukamurella pulmonis</i>           |
| <i>Porphyromonas catoniae</i>              | <i>Ruminococcus productus</i>            | <i>Tsukamurella tyrosinosolvens</i>    |
| <i>Porphyromonas circumdentaria</i>        | <i>Saccharomonospora viridis</i>         | <i>Ureaplasma urealyticum</i>          |
| <i>Porphyromonas endodontalis</i>          | <i>Saccharopolyspora rectivirgula</i>    | <i>Veillonella atypica</i>             |
| <i>Porphyromonas gingivalis</i>            | <i>Salmonella bongori</i>                | <i>Veillonella dispar</i>              |
| <i>Porphyromonas levii</i>                 | <i>Salmonella choleraesuis</i>           | <i>Veillonella parvula</i>             |
| <i>Porphyromonas macacae</i>               | <u><i>Salmonella enteritidis</i></u>     | <i>Vibrio alginolyticus</i>            |
| <i>Prevotella bivia</i>                    | <i>Salmonella typhi</i>                  | <i>Vibrio cholerae</i>                 |
| <i>Prevotella buccae</i>                   | <u><i>Salmonella typhimurium</i></u>     | <i>Vibrio cincinnatiensis</i>          |
| <i>Prevotella buccalis</i>                 | <i>Sebaldella termitidis</i>             | <i>Vibrio fluvialis</i>                |
| <i>Prevotella corporis</i>                 | <i>Selenomonas artemidis</i>             | <i>Vibrio furnissii</i>                |
| <i>Prevotella dentalis</i>                 | <i>Selenomonas dianae</i>                | <i>Vibrio furnissii</i>                |
| <i>Prevotella denticola</i>                | <i>Selenomonas flueggei</i>              | <i>Vibrio hollisae</i>                 |
| <i>Prevotella disiens</i>                  | <i>Selenomonas infelix</i>               | <i>Vibrio mimicus</i>                  |
| <i>Prevotella enoeca</i>                   | <i>Selenomonas noxia</i>                 | <u><i>Vibrio parahaemolyticus</i></u>  |
| <i>Prevotella heparinolytica</i>           | <i>Serratia ficaria</i>                  | <u><i>Vibrio vulnificus</i></u>        |
| <i>Prevotella intermedia</i>               | <u><i>Serratia marcescens</i></u>        | <i>Wolinella succinogenes</i>          |
| <i>Prevotella loescheii</i>                | <i>Serratia odorifera</i>                | <i>Yersinia bercovieri</i>             |
| <i>Prevotella melaninogenica</i>           | <i>Serratia plymuthica</i>               | <u><i>Yersinia enterocolitica</i></u>  |
| <i>Prevotella nigrescens</i>               | <i>Serratia proteamaculans</i>           | <i>Yersinia frederiksenii</i>          |
| <i>Prevotella oralis</i>                   | <i>Serratia rubidaea</i>                 | <i>Yersinia intermedia</i>             |
| <i>Prevotella oris</i>                     | <i>Shigella boydii</i>                   | <i>Yersinia kristensenii</i>           |
| <i>Prevotella oulora</i>                   | <u><i>Shigella dysenteriae</i></u>       | <i>Yersinia mollahetii</i>             |
| <i>Prevotella ruminicola</i>               | <i>Shigella flexneri</i>                 | <u><i>Yersinia pestis</i></u>          |
| <i>Prevotella tanneriae</i>                | <i>Shigella sonnei</i>                   | <i>Yersinia pseudotuberculosis</i>     |
| <i>Prevotella veroralis</i>                | <i>Sphingomonas paucimobilis</i>         | <i>Yersinia rohdei</i>                 |
| <i>Prevotella zoogloeiformans</i>          | <i>Spirillum minus</i>                   | <i>Yersinia ruckeri</i>                |
| <i>Propionibacterium acnes</i>             | <u><i>Staphylococcus aureus</i></u>      |                                        |
| <i>Propionibacterium avidum</i>            | <u><i>Staphylococcus epidermidis</i></u> | <b>Fungi</b>                           |
| <i>Propionibacterium granulosum</i>        | <i>Staphylococcus haemolyticus</i>       | <i>Absidia corymbifera</i>             |
| <i>Propionibacterium propionicus</i>       | <i>Staphylococcus hyicus</i>             | <i>Acremonium alabamense</i>           |
| <i>Proteus mirabilis</i>                   | <i>Staphylococcus intermedius</i>        | <i>Acremonium curvulum</i>             |
| <i>Proteus penneri</i>                     | <i>Staphylococcus lugdunensis</i>        | <i>Acremonium falciforme</i>           |
| <i>Proteus vulgaris</i>                    | <i>Staphylococcus saprophyticus</i>      | <i>Acremonium kiliense</i>             |
| <i>Providencia alcalifaciens</i>           | <i>Staphylococcus warneri</i>            | <i>Acremonium potronii</i>             |
|                                            | <i>Stenotrophomonas maltophilia</i>      | <i>Acremonium recifei</i>              |

- Acremonium roseogriseum*  
*Acremonium strictum*  
*Acrophialophora fusispora*  
*Actinomadura madurae*  
*Actinomadura pelletieri*  
***Alternaria alternata***  
*Alternaria chlamydospora*  
*Alternaria dianthicola*  
***Alternaria infectoria***  
*Alternaria longipes*  
*Alternaria stemphyloides*  
*Alternaria tenuissima*  
*Aphanoascus fulvescens*  
*Apophysomyces elegans*  
*Arthrinium phaeospermum*  
*Aspergillus candidus*  
*Aspergillus clavatus*  
*Aspergillus fisherianus*  
*Aspergillus flavipes*  
***Aspergillus flavus* group**  
***Aspergillus fumigatus* group**  
*Aspergillus glaucus*  
***Aspergillus nidulans* group**  
***Aspergillus niger***  
*Aspergillus oryzae*  
***Aspergillus terreus* group**  
*Aspergillus versicolor*  
*Aspergillus wentii*  
*Aureobasidium pullulans*  
***Basidiobolus ranarum***  
*Beauveria bassiana*  
***Bipolaris australiensis***  
***Bipolaris hawaiiensis***  
***Bipolaris spicifera***  
***Blastomyces dermatitidis***  
***Blastoschizomyces capitatus***  
***Botryomyces caespitosus***  
*Botryosphaeria subglobosa*  
***Candida albicans***  
*Candida catenulata*  
*Candida famata*  
***Candida glabrata***  
***Candida guilliermondii***  
*Candida haemulonis*  
*Candida intermedia*  
*Candida kefyr*  
***Candida krusei***  
*Candida lambica*  
*Candida lipolytica*  
***Candida lusitanae***  
*Candida norvegensis*  
***Candida parapsilosis***  
*Candida rugosa*  
***Candida tropicalis***  
*Candida viswanathii*  
*Candida zeylanoides*  
*Cephalophora irregularis*  
*Cerinosterus cyanescens*  
*Chaetomium atrobtunneum*  
*Chaetomium funicola*  
*Chaetomium globosum*  
*Chaetomium perpulchrum*  
*Chaetomium strumarium*  
*Chaetophoma dermo-unguis*  
*Chlamydoabsidia padenii*  
*Chlorella protothecoides*
- Chrysonilia sitophila*  
*Cladophialophora arxii*  
***Cladophialophora bantiana***  
*Cladophialophora boppii*  
*Cladophialophora carrionii*  
*Cladophialophora devriesii*  
*Cladorrhinum bulbillosum*  
*Cladosporium cladosporioides*  
*Cladosporium elatum*  
*Cladosporium oxysporum*  
*Cladosporium sphaerospermum*  
***Coccidioides immitis***  
***Cokeromyces recurvatus***  
*Colletotrichum coccodes*  
*Colletotrichum dematium*  
*Colletotrichum gloeosporioides*  
***Conidiobolus coronatus***  
***Conidiobolus incongruus***  
***Conidiobolus lamprauges***  
*Coniothyrium fuckelii*  
*Coprinus cinereus*  
***Cryptococcus neoformans***  
***Cunninghamella bertholletiae***  
*Curvularia brachyspora*  
*Curvularia clavata*  
***Curvularia geniculata***  
***Curvularia lunata***  
***Curvularia pallescens***  
***Curvularia senegalensis***  
***Curvularia veruculosa***  
*Cylindrocarpon cyanescens*  
*Cylindrocarpon lichenicola*  
*Cylindrocarpon vaginiae*  
*Dichotomophthora portulacae*  
*Dichotomophthoropsis nympphaerum*  
*Dissitimurus exedrus*  
*Doratomyces stemonitis*  
***Drechslera biseptata***  
***Emmonsia crescens***  
***Emmonsia parva***  
*Engyodontium album*  
***Epidermophyton floccosum***  
*Exophiala dermatitidis*  
***Exophiala jeanselmei***  
*Exophiala moniliae*  
***Exophiala pisciphila***  
***Exophiala psychrophila***  
***Exophiala salmonis***  
***Exophiala spinifera***  
*Exserohilum longirostratum*  
*Exserohilum macginnisii*  
*Fusarium aquaeductuum*  
*Fusarium chlamydosporum*  
*Fusarium dimerum*  
*Fusarium incarnatum*  
***Fusarium moniliforme***  
*Fusarium napiforme*  
*Fusarium nivale*  
***Fusarium oxysporum***  
*Fusarium pallidoroseum*  
*Fusarium proliferatum*  
*Fusarium sacchari*  
***Fusarium solani***  
*Fusarium subglutinans*  
*Fusarium ventricosum*  
*Fusarium verticillioides*
- Hansenula anomala*  
***Histoplasma capsulatum***  
*Hortaea werneckii*  
*Lasiodiplodia theobromae*  
*Lecythophora hoffmannii*  
*Lecythophoramutabilis*  
*Leptosphaeria senegalensis*  
*Leptosphaeria tompkinsii*  
***Loboa loboii***  
***Madurella grisea***  
*Madurella mycetomati*  
***Malassezia furfur***  
***Malassezia globosa***  
***Malassezia obtusa***  
***Malassezia pachydermatis***  
***Malassezia restricta***  
***Malassezia slooffiae***  
***Malassezia sympodialis***  
*Microascus cinereus*  
*Microascus cirrosus*  
***Microsporum audouinii***  
***Microsporum canis***  
***Microsporum equinum***  
*Microsporum ferrugineum*  
***Microsporum fulvum***  
***Microsporum gallinae***  
***Microsporum gypseum***  
***Microsporum nanum***  
***Microsporum persicolor***  
*Microsporum praecox*  
*Microsporum racemosum*  
***Microsporum vanbreuseghemii***  
***Moniliella suavelolens***  
***Mucor circinelloides***  
*Mucor hiemalis*  
***Mucor indicus***  
*Mucor racemosus*  
***Mucor ramosissimus***  
*Myceliophthora thermophila*  
*Mycocentrospora acerina*  
*Mycocleptodiscus indicus*  
*Myriodontium keratinophilum*  
***Nannizzia cajetani***  
*Nattrassia mangiferae*  
*Neocosmospora vasinfecta*  
*Neotestudina rosatii*  
*Nigrospora sphaerica*  
***Ochroconis gallopava***  
*Oidiodendron cerealis*  
*Onychocola canadensis*  
*Ovadendron ochraceum*  
*Ovadendron sulphureo-ochraceum*  
*Paecilomyces farinosus*  
***Paecilomyces fumerosoreus***  
*Paecilomyces javanicus*  
***Paecilomyces lilacinus***  
*Paecilomyces marquandii*  
***Paecilomyces variotii***  
*Paecilomyces viridis*  
***Paracoccidioides brasiliensis***  
*Penicillium chrysogenum*  
*Penicillium citrinum*  
*Penicillium commune*  
*Penicillium decumbens*  
*Penicillium dupontii*  
*Penicillium expansum*

**Penicillium marneffeii**

*Penicillium purpurogenum*  
*Phaeoanellomyces elegans*  
*Phaeoanellomyces werneckii*  
***Phaeosclera dematioides***  
*Phaeotrichoconis crotalariae*  
***Phialemonium curvatum***  
***Phialemonium obovatum***  
*Phialophora bubakii*  
*Phialophora pedrosoi*  
*Phialophora repens*  
*Phialophora richardsiae*  
***Phialophora verrucosa***  
*Phoma cava*

*Phoma cruris-hominis*

*Phoma eupyrena*

*Phoma glomerata*

***Phoma herbarum***

*Phoma hibernica*

*Phoma minutella*

*Phoma oculo-hominis*

*Phyllosticta citricarpa*

***Piedraia hortae***

*Pleurophoma pleurospora*

***Pneumocystis carinii***

***Prototheca wickerhamii***

***Prototheca zopfii***

***Pseudoallescheria boydii***

***Pseudomicrodochium suttonii***

*Pyrenochaeta mackinnonii*

*Pyrenochaeta romeroi*

*Pyrenochaeta unguis-hominis*

***Pythium insidiosum***

*Rhinocladiella aquaspersa*

*Rhinocladiella compacta*

*Rhinocladiella obovoidea*

*Rhinocladiella schulzeri*

***Rhinosporidium seeberi***

***Rhizomucor miehei***

***Rhizomucor pusillus***

*Rhizopus azygosporus*

***Rhizopus microsporus***

***Rhizopus oryzae***

*Rhizopus stolonifer*

*Rhodotorula glutinis*

*Rhodotorula minuta*

***Rhodotorula mucilaginosa***

*Rhodotorula rubra*

*Saccharomyces cerevisiae*

*Saksenaea vasiformis*

***Sarcinomyces phaeomuriformis***

***Scedosporium prolificans***

*Schizophyllum commune*

***Scolecobasidium humicola***

***Scolecobasidium tshawytschae***

*Scopulariopsis acremonium*

*Scopulariopsis asperula*

***Scopulariopsis brevicaulis***

*Scopulariopsis brumptii*

*Scopulariopsis candida*

*Scopulariopsis flava*

*Scopulariopsis fusca*

*Scytalidium hyalinum*

*Scytalidium infestans*

*Setosphaeria rostrata*

***Sporothrix schenckii***

*Stenella araguata*

*Streptomyces somaliensis*

*Taeniocella exilis*

*Taeniocella stilbospora*

*Tetraploa aristata*

*Thermomyces lanuginosus*

*Torulopsis magnoliae*

*Trichoderma pseudokoningii*

*Trichoderma viride*

*Trichomaris invadens*

***Trichophyton ajelloi***

*Trichophyton concentricum*

***Trichophyton equinum***

***Trichophyton gallinae***

*Trichophyton gourvillii*

***Trichophyton megninii***

***Trichophyton mentagrophytes***

***Trichophyton rubrum***

***Trichophyton schoenleinii***

***Trichophyton simii***

*Trichophyton soudanense*

***Trichophyton tonsurans***

***Trichophyton verrucosum***

***Trichophyton violaceum***

***Trichosporon asahii***

***Trichosporon beigeli***

***Trichosporon cutaneum***

***Trichosporon inkin***

***Trichosporon mucoides***

***Trichosporon ovoides***

*Tritirachium oryzae*

*Tubercularia vulgaris*

*Ulocladium chartarum*

*Veronaea botryosa*

*Verticillium nigrescens*

*Volutella cinerescens*

**Helminths**

***Acanthocephalus rauschi***

***Achillurbainia noveli***

***Achillurbainia recondita***

***Alaria americana***

***Alaria marcianae***

***Amphimerus pseudofelineus***

***Anatrichosoma cutaneum***

***Ancylostoma braziliense***

***Ancylostoma caninum***

***Ancylostoma ceylanicum***

***Ancylostoma duodenale***

***Ancylostoma malayanum***

***Anisakis physeteri***

***Anisakis simplex***

***Aonchotheca philippinensis***

***Apophallus donicus***

***Artyfechinostomum mehrai***

***Ascaris lumbricoides***

***Ascaris suum***

***Ascocotyle* sp.**

***Australobilharzia terrigalensis***

***Baylisascaris procyonis***

***Bertiella mucronata***

***Bertiella studeri***

***Bilharziella polonica***

***Bolbosoma* sp.**

***Brugia beaveri***

***Brugia guyanensis***

***Brugia malayi***

***Brugia pahangi***

*Brugia timori*

***Bunostomum phlebotomum***

***Calodium hepaticum***

***Carneocephalus brevicæa***

***Cathaemasia cabrerai***

***Centrocestus armatus***

***Centrocestus formosanus***

***Cheilospirura* sp.**

***Clinostomum complanatum***

***Contraecaecum osculatum***

***Corynosoma strumosum***

***Cryptocotyle lingua***

***Cyclodontostomum purvisi***

***Dicrocoelium dendriticum***

***Dicrocoelium hospes***

***Diocotophyme renale***

***Dipetalonema arbuta***

***Dipetalonema reconditum***

***Diphyllbothrium cameroni***

***Diphyllbothrium cordatum***

***Diphyllbothrium dalliae***

***Diphyllbothrium dendriticum***

***Diphyllbothrium elegans***

***Diphyllbothrium erinaceeuropæi***

***Diphyllbothrium hians***

***Diphyllbothrium houghtoni***

***Diphyllbothrium klebanovskii***

***Diphyllbothrium lanceolatum***

***Diphyllbothrium latum***

***Diphyllbothrium mansonioides***

***Diphyllbothrium nihonkaiense***

***Diphyllbothrium orcinii***

***Diphyllbothrium pacificum***

***Diphyllbothrium scoticum***

***Diphyllbothrium stemmacephalum***

***Diphyllbothrium theileri***

***Diplogonoporus balaenopterae***

***Diplogonoporus brauni***

***Diplogonoporus fukuokaensis***

***Diplostomum spathaceum***

***Dipylidium caninum***

***Dirofilaria immitis***

***Dirofilaria repens***

***Dirofilaria striata***

***Dirofilaria subdermata***

***Dirofilaria tenuis***

***Dirofilaria ursi***

***Dracunculus insignis***

***Dracunculus medinensis***

***Drepanidotaenia lanceolata***

***Echinochasmus japonicus***

***Echinochasmus jufoensis***

***Echinochasmus perfoliatus***

***Echinococcus granulosus***

***Echinococcus multilocularis***

***Echinococcus oligarthus***

***Echinococcus vogeli***

***Echinoparyphium recurvatum***

***Echinostoma cinetorchis***

***Echinostoma echinatum***

***Echinostoma hortense***

***Echinostoma ilocanum***

***Echinostoma jassyense***

***Echinostoma macrorchis***

|                                         |                                        |                                         |
|-----------------------------------------|----------------------------------------|-----------------------------------------|
| <i>Echinostoma malayanum</i>            | <i>Multiceps glomeratus</i>            | <i>Schistosoma bovis</i>                |
| <i>Echinostoma revolutum</i>            | <i>Multiceps longihamatus</i>          | <i>Schistosoma haematobium</i>          |
| <i>Enterobius gregorii</i>              | <i>Multiceps multiceps</i>             | <i>Schistosoma intercalatum</i>         |
| <i>Enterobius vermicularis</i>          | <i>Multiceps serialis</i>              | <i>Schistosoma japonicum</i>            |
| <i>Episthmium caninum</i>               | <i>Nanophyetus salmincola</i>          | <i>Schistosoma malayensis</i>           |
| <i>Eucoleus aerophilus</i>              | <i>Necator americanus</i>              | <u><i>Schistosoma mansoni</i></u>       |
| <i>Eurytrema pancreaticum</i>           | <i>Nematodirus abnormalis</i>          | <i>Schistosoma mattheei</i>             |
| <i>Eustrongylides</i> sp.               | <i>Neodiplostomum</i> sp.              | <i>Schistosoma mekongi</i>              |
| <i>Fasciola gigantica</i>               | <i>Oesophagostomum aculeatum</i>       | <i>Schistosoma mekhaini</i>             |
| <i>Fasciola hepatica</i>                | <i>Oesophagostomum bifurcum</i>        | <i>Schistosoma spindale</i>             |
| <i>Fasciola indica</i>                  | <i>Oesophagostomum stephanostomum</i>  | <i>Schistosomatium douthitti</i>        |
| <i>Fasciolopsis buski</i>               | <u><i>Onchocerca volvulus</i></u>      | <i>Setaria equina</i>                   |
| <i>Fibricola seoulensis</i>             | <i>Opisthorchis felinus</i>            | <i>Spirocerca lupi</i>                  |
| <i>Gastrodiscoides hominis</i>          | <i>Opisthorchis guayaquilensis</i>     | <i>Stellantchasmus falcatus</i>         |
| <i>Gigantobilharzia huttoni</i>         | <i>Opisthorchis neverca</i>            | <i>Stictodora fuscata</i>               |
| <i>Gigantobilharzia sturniae</i>        | <i>Opisthorchis sinensis</i>           | <i>Strongyloides fuelleborni</i>        |
| <i>Gnathostoma doloresi</i>             | <i>Opisthorchis viverrini</i>          | <i>Strongyloides papillosus</i>         |
| <i>Gnathostoma hispidum</i>             | <i>Orientobilharzia turkestanica</i>   | <i>Strongyloides ransomi</i>            |
| <i>Gnathostoma nipponicum</i>           | <i>Ornithobilharzia</i> sp.            | <u><i>Strongyloides stercoralis</i></u> |
| <i>Gnathostoma spinigerum</i>           | <i>Ostertagia ostertagi</i>            | <i>Strongyloides westeri</i>            |
| <i>Gongylonema pulchrum</i>             | <i>Paragonimus africanus</i>           | <i>Syphacea obvelata</i>                |
| <i>Gymnophalloides</i> sp.              | <i>Paragonimus bankokensis</i>         | <i>Taenia crassiceps</i>                |
| <i>Haemonchus contortus</i>             | <i>Paragonimus caliensis</i>           | <i>Taenia saginata</i>                  |
| <i>Haplorchis pumilo</i>                | <i>Paragonimus heterotremus</i>        | <u><i>Taenia solium</i></u>             |
| <i>Haplorchis taichui</i>               | <i>Paragonimus hueit'ungensis</i>      | <i>Taenia taeniaeformis</i>             |
| <i>Haplorchis vanissima</i>             | <i>Paragonimus kellicotti</i>          | <i>Teladorsagia circumcincta</i>        |
| <i>Haplorchis yokogawai</i>             | <i>Paragonimus mexicanus</i>           | <i>Ternidens deminutus</i>              |
| <i>Heterobilharzia americana</i>        | <i>Paragonimus miyazakii</i>           | <i>Thelazia californiensis</i>          |
| <i>Heterophyes dispar</i>               | <i>Paragonimus ohirai</i>              | <i>Thelazia callipaeda</i>              |
| <i>Heterophyes heterophyes</i>          | <i>Paragonimus philippinensis</i>      | <i>Thelazia rhodesii</i>                |
| <i>Heterophyes nocens</i>               | <i>Paragonimus sadoensis</i>           | <i>Toxascaris leonina</i>               |
| <i>Heterophyopsis continua</i>          | <i>Paragonimus siamensis</i>           | <i>Toxocara canis</i>                   |
| <i>Himasthala muehlensi</i>             | <i>Paragonimus skrjabini</i>           | <i>Toxocara cati</i>                    |
| <i>Hymenolepis diminuta</i>             | <i>Paragonimus uterobilateralis</i>    | <i>Trichinella britovi</i>              |
| <i>Hymenolepis nana</i>                 | <i>Paragonimus westermani</i>          | <i>Trichinella nativa</i>               |
| <i>Hypoderaeum conoideum</i>            | <i>Parascaris equorum</i>              | <i>Trichinella nelsoni</i>              |
| <i>Inermicapsifer madagascariensis</i>  | <i>Parastrongylus cantonensis</i>      | <i>Trichinella pseudospiralis</i>       |
| <i>Isoparorchis hypselobagri</i>        | <i>Parastrongylus costaricensis</i>    | <u><i>Trichinella spiralis</i></u>      |
| <i>Lagochilascaris minor</i>            | <i>Pearsonema plica</i>                | <i>Trichinella T5</i>                   |
| <i>Ligula intestinalis</i>              | <i>Pelodera strongyloides</i>          | <i>Trichobilharzia brevis</i>           |
| <u><i>Loa loa</i></u>                   | <i>Phaneropterus bonnei</i>            | <i>Trichobilharzia ocellata</i>         |
| <i>Macracanthorhynchus hirudinaceus</i> | <i>Philophthalmus lacrymosus</i>       | <i>Trichobilharzia stagnicolae</i>      |
| <i>Macracanthorhynchus ingens</i>       | <i>Phocanema decipiens</i>             | <i>Trichostrongylus affinis</i>         |
| <i>Mammomonogamus laryngeus</i>         | <i>Physaloptera caucasica</i>          | <i>Trichostrongylus axei</i>            |
| <i>Mammomonogamus nasicola</i>          | <i>Physaloptera transfuga</i>          | <i>Trichostrongylus brevis</i>          |
| <i>Mansonella ozzardi</i>               | <i>Plagiorchis harinasutai</i>         | <i>Trichostrongylus calcaratus</i>      |
| <i>Mansonella perstans</i>              | <i>Plagiorchis javensis</i>            | <i>Trichostrongylus capricola</i>       |
| <i>Mansonella rodhaini</i>              | <i>Plagiorchis muris</i>               | <i>Trichostrongylus colubriformis</i>   |
| <i>Mansonella semiclarum</i>            | <i>Plagiorchis philippinensis</i>      | <i>Trichostrongylus instabilis</i>      |
| <i>Mansonella streptocerca</i>          | <i>Poikilorchis congolensis</i>        | <i>Trichostrongylus lerouxi</i>         |
| <i>Marshallagia marshalli</i>           | <i>Procerovum calderoni</i>            | <i>Trichostrongylus orientalis</i>      |
| <i>Mathevotaenia symmetrica</i>         | <i>Prohemistomum vivax</i>             | <i>Trichostrongylus probolurus</i>      |
| <i>Mecistocirrus digitatus</i>          | <i>Prosthodendrium molenkampii</i>     | <i>Trichostrongylus skrjabini</i>       |
| <i>Meningonema peruzzii</i>             | <i>Pseudamphistomum aethiopicum</i>    | <i>Trichostrongylus vitrinus</i>        |
| <i>Mesocestoides lineatus</i>           | <i>Pseudamphistomum truncatum</i>      | <i>Trichuris suis</i>                   |
| <i>Mesocestoides variabilis</i>         | <i>Psilorchis hominis</i>              | <i>Trichuris trichiura</i>              |
| <i>Metagonimus minutus</i>              | <i>Pygidiopsis summa</i>               | <i>Trichuris vulpis</i>                 |
| <i>Metagonimus yokogawai</i>            | <i>Pyramicocephalus anthrocephalus</i> | <i>Uncinaria stenocephala</i>           |
| <i>Metastrongylus elongatus</i>         | <i>Raillietina celebensis</i>          | <i>Watsonius watsoni</i>                |
| <i>Metorchis albidus</i>                | <i>Raillietina demerariensis</i>       | <u><i>Wuchereria bancrofti</i></u>      |
| <u><i>Metorchis conjunctus</i></u>      | <i>Rhabditis elongata</i>              | <i>Wuchereria lewisi</i>                |
| <i>Microfilaria bolivarensis</i>        | <i>Rhabditis inermis</i>               |                                         |
| <i>Micronema deletrix</i>               | <i>Rhabditis niellyi</i>               |                                         |
| <i>Moniezia expansa</i>                 | <i>Rhabditis pellio</i>                |                                         |
| <i>Moniliformis moniliformis</i>        | <i>Rictularia</i> sp.                  |                                         |
| <i>Multiceps brauni</i>                 | <i>Schistocephalus solidus</i>         |                                         |

## Protozoa

*Acanthamoeba astronyxis*  
*Acanthamoeba castellanii*  
*Acanthamoeba culbertsoni*

|                                               |                                                         |                                             |
|-----------------------------------------------|---------------------------------------------------------|---------------------------------------------|
| <i>Acanthamoeba hatchetti</i>                 | <b>Apoi virus</b>                                       | <b>Hughes virus</b>                         |
| <i>Acanthamoeba palestinensis</i>             | <b><u>Australian bat lyssavirus</u></b>                 | Human adenovirus A                          |
| <i>Acanthamoeba polyphaga</i>                 | <u>B19 virus</u>                                        | Human adenovirus B                          |
| <i>Acanthamoeba rhysoides</i>                 | <b>Bagaza virus</b>                                     | Human adenovirus C                          |
| <b><i>Babesia bovis</i></b>                   | <b>Bangui virus</b>                                     | Human adenovirus D                          |
| <b><i>Babesia divergens</i></b>               | <b><u>Banna virus</u></b>                               | Human adenovirus E                          |
| <b><i>Babesia gibsoni</i></b>                 | <b>Banzi virus</b>                                      | Human adenovirus F                          |
| <b><u><i>Babesia microti</i></u></b>          | <b><u>Barmah Forest virus</u></b>                       | <u>Human astrovirus</u>                     |
| <i>Balamuthia mandrillaris</i>                | <b>Batken virus</b>                                     | Human Coronavirus 229E                      |
| <b><i>Balantidium coli</i></b>                | <b>Bayou virus</b>                                      | Human Coronavirus OC43                      |
| <b><i>Blastocystis hominis</i></b>            | <b>Bebaru virus</b>                                     | Human enterovirus 68                        |
| <b><u><i>Cryptosporidium parvum</i></u></b>   | <b>Bhanja virus</b>                                     | Human enterovirus 70                        |
| <b><u><i>Cyclospora cayetanensis</i></u></b>  | BK virus                                                | Human enterovirus A                         |
| <b><i>Dientamoeba fragilis</i></b>            | <b>Black creek canal virus</b>                          | <u>Human enterovirus B</u>                  |
| <b><u><i>Encephalitozoon cuniculi</i></u></b> | <b>Borna disease virus</b>                              | Human enterovirus C                         |
| <u><i>Encephalitozoon hellem</i></u>          | <b>Bovine Ephemeral Fever virus</b>                     | Human enterovirus D                         |
| <u><i>Encephalitozoon intestinalis</i></u>    | <b>Bovine Papular Stomatitis virus</b>                  | <u>Human Herpesvirus 1</u>                  |
| <b><i>Entamoeba chattoni</i></b>              | <b><u>BSE agent</u></b>                                 | <u>Human Herpesvirus 2</u>                  |
| <b><i>Entamoeba histolytica</i></b>           | <b>Buffalopox virus</b>                                 | <u>Human Herpesvirus 3</u>                  |
| <i>Entamoeba moshkovskii</i>                  | <b>Bunyamwera virus</b>                                 | Human Herpesvirus 4                         |
| <u><i>Enterocytozoon bieneusi</i></u>         | <b>Bussuquara virus</b>                                 | <u>Human Herpesvirus 5</u>                  |
| <b><u><i>Giardia duodenalis</i></u></b>       | <b>Bwamba virus</b>                                     | Human Herpesvirus 6                         |
| <b><u><i>Isospora belli</i></u></b>           | <b><u>California encephalitis virus</u></b>             | Human Herpesvirus 7                         |
| <b><i>Leishmania aethiopica</i></b>           | <b>Candiru virus complex</b>                            | <u>Human Herpesvirus 8</u>                  |
| <b><i>Leishmania amazonensis</i></b>          | <b>Caraparu virus</b>                                   | <u>Human Immunodeficiency Virus 1</u>       |
| <b><i>Leishmania braziliensis</i></b>         | <b>Catu virus</b>                                       | <u>Human Immunodeficiency Virus 2</u>       |
| <b><i>Leishmania chagasi</i></b>              | <b><u>Cercopithecine herpes virus 1</u></b>             | <u>Human papillomavirus</u>                 |
| <b><u><i>Leishmania donovani</i></u></b>      | <b>Chandipura virus</b>                                 | Human parainfluenza virus 1                 |
| <b><i>Leishmania guyanensis</i></b>           | <b>Changuinola virus</b>                                | Human parainfluenza virus 2                 |
| <b><u><i>Leishmania infantum</i></u></b>      | <b><u>Chikungunya virus</u></b>                         | Human parainfluenza virus 3                 |
| <b><i>Leishmania lainsoni</i></b>             | <b>Chim virus</b>                                       | Human parainfluenza virus 4                 |
| <b><i>Leishmania major</i></b>                | CJD agent                                               | Human parechovirus type 1                   |
| <b><i>Leishmania mexicana</i></b>             | <b>Colorado tick fever virus</b>                        | Human parechovirus type 2                   |
| <b><i>Leishmania naiffi</i></b>               | <b>Cote d'Ivoire Ebola virus</b>                        | Human Respiratory Syncytial virus           |
| <b><i>Leishmania panamensis</i></b>           | <b>Cowpox virus</b>                                     | Human Rhinovirus A                          |
| <b><i>Leishmania peruviana</i></b>            | <b><u>Crimean-Congo haemorrhagic fever virus</u></b>    | Human Rhinovirus B                          |
| <b><i>Leishmania pifanoi</i></b>              | <b>Dakar bat virus</b>                                  | <u>Human T-Lymphotropic Virus 1</u>         |
| <b><i>Leishmania shawi</i></b>                | <b><u>Dengue virus</u></b>                              | <b>Igbo-ora virus</b>                       |
| <b><i>Leishmania tropica</i></b>              | <b>Dhori virus</b>                                      | <b>Ilheus virus</b>                         |
| <b><i>Leishmania venezuelensis</i></b>        | <b>Dobrava-Belgrade virus</b>                           | <b><u>Influenza A virus</u></b>             |
| <i>Naegleria fowleri</i>                      | <b>Dugbe virus</b>                                      | <b>Influenza B virus</b>                    |
| <i>Nosema africanum</i>                       | <b>Duvenhage virus</b>                                  | <b>Influenza C virus</b>                    |
| <i>Nosema ceylonensis</i>                     | <b><u>Eastern equine encephalitis virus</u></b>         | <b>Issyk-Kul virus</b>                      |
| <i>Nosema connori</i>                         | <b>Edge Hill virus</b>                                  | <b><u>Japanese encephalitis virus</u></b>   |
| <i>Nosema ocularum</i>                        | <b>Encephalomyocarditis virus</b>                       | JC virus                                    |
| <b><i>Pentatrichomonas hominis</i></b>        | <b>European bat lyssavirus 1</b>                        | <b><u>Junin virus</u></b>                   |
| <u><i>Plasmodium falciparum</i></u>           | <b>European bat lyssavirus 2</b>                        | <b>Juquitiba virus</b>                      |
| <b><i>Plasmodium knowlesi</i></b>             | <b><u>European Tick-borne encephalitis virus</u></b>    | <b>Kairi virus</b>                          |
| <b><i>Plasmodium malariae</i></b>             | <b>Everglades virus</b>                                 | <b>Kasokero virus</b>                       |
| <i>Plasmodium ovale</i>                       | <b>Eyach virus</b>                                      | <b>Kedougou virus</b>                       |
| <b><i>Plasmodium simium</i></b>               | <b><u>Far eastern Tick-borne encephalitis virus</u></b> | <b>Kemerovo virus</b>                       |
| <u><i>Plasmodium vivax</i></u>                | <b>Foot and mouth disease virus</b>                     | <b>Kokobera virus</b>                       |
| <b><i>Retortamonas intestinalis</i></b>       | <b>Gan gan virus</b>                                    | <b>Koutango virus</b>                       |
| <i>Sarcocystis hominis</i>                    | <b>Getah virus</b>                                      | <b><u>Kyasanur forest disease virus</u></b> |
| <b><i>Sarcocystis lindermanni</i></b>         | <b><u>Guama virus</u></b>                               | <b><u>Laguna Negra virus</u></b>            |
| <i>Sarcocystis suihominis</i>                 | <b><u>Guanarito virus</u></b>                           | <b>Lanjan virus</b>                         |
| <b><u><i>Toxoplasma gondii</i></u></b>        | <b>Guaroa virus</b>                                     | <b><u>Lassa virus</u></b>                   |
| <u><i>Trachipleistophora hominis</i></u>      | <b><u>Hantaan virus</u></b>                             | <b>Lebombo virus</b>                        |
| <b><i>Trichomonas tenax</i></b>               | <b><u>Hendra virus</u></b>                              | <b>Lechiguanas virus</b>                    |
| <u><i>Trichomonas vaginalis</i></u>           | <b><u>Hepatitis A virus</u></b>                         | <b>Louping ill virus</b>                    |
| <b><u><i>Trypanosoma brucei</i></u></b>       | <u>Hepatitis B virus</u>                                | <b>Lymphocytic choriomeningitis virus</b>   |
| <b><u><i>Trypanosoma cruzi</i></u></b>        | <u>Hepatitis C virus</u>                                | <b><u>Machupo virus</u></b>                 |
| <i>Vittaforma corneae</i>                     | <u>Hepatitis delta virus</u>                            | <b>Madrid virus</b>                         |
|                                               | <b><u>Hepatitis E virus</u></b>                         | <b><u>Marburg virus</u></b>                 |
|                                               | <u>Hepatitis G virus</u>                                | <b>Marituba virus</b>                       |
|                                               | <b>HU39694 virus</b>                                    | <b><u>Mayaro virus</u></b>                  |
| <b>Viruses (and prions)</b>                   |                                                         |                                             |
| <b><u>Andes virus</u></b>                     |                                                         |                                             |

|                                         |                                             |
|-----------------------------------------|---------------------------------------------|
| <u>Measles virus</u>                    | Trubanaman virus                            |
| <u>Menangle virus</u>                   | Tyuleniy virus                              |
| Mokola virus                            | Usutu virus                                 |
| Molluscum contagiosum virus             | Variola virus                               |
| <u>Monkeypox virus</u>                  | <u>Venezuelan Equine Encephalitis virus</u> |
| Monongahela virus                       | Vesicular stomatitis virus                  |
| Mucambo virus                           | Wad Medani virus                            |
| Mumps virus                             | Wanowrie virus                              |
| <u>Murray Valley encephalitis virus</u> | <u>Wesselsbron virus</u>                    |
| New York virus                          | <u>West Nile virus</u>                      |
| Newcastle disease virus                 | <u>Western Equine Encephalitis virus</u>    |
| <u>Nipah virus</u>                      | Wyeomyia virus                              |
| <u>Norwalk virus</u>                    | Yaba monkey tumor virus                     |
| Nyando virus                            | <u>Yellow fever virus</u>                   |
| Ockelbo virus                           | Yogue virus                                 |
| Omsk haemorrhagic fever virus           | <u>Zaire Ebola virus</u>                    |
| <u>O'nyong-nyong virus</u>              | <u>Zika virus</u>                           |
| Oran virus                              | <u>Zinga virus</u>                          |
| Orf virus                               |                                             |
| Oriboca virus                           |                                             |
| <u>Oropouche virus</u>                  |                                             |
| Orungo virus                            |                                             |
| Phnom-Penh bat virus                    |                                             |
| <u>Picobirnavirus</u>                   |                                             |
| Piry virus                              |                                             |
| <u>Poliovirus</u>                       |                                             |
| Powassan virus                          |                                             |
| Pseudocowpox virus                      |                                             |
| Punta Toro virus                        |                                             |
| <u>Puumala virus</u>                    |                                             |
| Quaranfil Virus                         |                                             |
| <u>Rabies virus</u>                     |                                             |
| <u>Reston Ebola virus</u>               |                                             |
| <u>Rift Valley fever virus</u>          |                                             |
| Rio Bravo virus                         |                                             |
| <u>Rocio virus</u>                      |                                             |
| <u>Ross River virus</u>                 |                                             |
| <u>Rotavirus A</u>                      |                                             |
| <u>Rotavirus B</u>                      |                                             |
| <u>Rotavirus C</u>                      |                                             |
| Rotavirus D                             |                                             |
| Rotavirus E                             |                                             |
| Rotavirus F                             |                                             |
| Royal Farm virus                        |                                             |
| Rubella virus                           |                                             |
| <u>Sabio virus</u>                      |                                             |
| Saimiriine herpesvirus 1                |                                             |
| <u>Salehabad virus</u>                  |                                             |
| <u>Sandfly fever Naples virus</u>       |                                             |
| Sandfly fever virus group               |                                             |
| Saumarez Reef virus                     |                                             |
| Sealpox virus                           |                                             |
| Semliki Forest virus                    |                                             |
| <u>Seoul virus</u>                      |                                             |
| Sepik virus                             |                                             |
| <u>Sin Nombre virus</u>                 |                                             |
| <u>Sindbis virus</u>                    |                                             |
| <u>St. Louis encephalitis virus</u>     |                                             |
| Sudan Ebola virus                       |                                             |
| Suid herpesvirus 1                      |                                             |
| Swine vesicular disease virus           |                                             |
| Tacaiuma virus                          |                                             |
| Tandy virus                             |                                             |
| Tanapox virus                           |                                             |
| Tataguine virus                         |                                             |
| Thogoto virus                           |                                             |
